# Supplementary material
Source: PubMed Central journal article supplement (PMC9002285)
Supplement: djac003_supplementary_data.pdf [file djac003_supplementary_data.pdf]

# SUPPLEMENTARY MATERIALS

## Supplementary Methods

### **Harmonization of lifestyle and environmental data**

Data harmonization procedures using a standardized protocol were carried out at the coordinating center at the Fred Hutchinson Cancer Center in Seattle, WA. The iterative data harmonization process took into account all individual study protocols and data collection methodologies. In summary, the first step of the data harmonization process consisted of defining common data elements (CDEs), which were used to map study-specific data elements. These CDEs were then transformed and grouped into one common dataset with uniform definitions and coding, and standardized values within a predefined range. Outlying values were reclassified according to the minimum or maximum permissible value for each respective variable. The final dataset was reviewed for quality assurance.

### **Assessment of Lifestyle and Environmental Variables**

Information on demographics, lifestyle, dietary, and pharmacological factors were ascertained through self-report by means of in-person interviews and/or structured questionnaires. All self-reported variables were collected at the reference time of each respective study, defined as blood collection or participant selection for cohort studies, and approximately 1-2 years preceding participant selection for case-control studies. Among studies that captured height and BMI through direct measurement, these variables were ascertained at the reference time for each corresponding study. In order to ensure congruence of risk factors across studies, a multi-phase, iterative harmonization process was undertaken for all included data. Lastly, we performed sex- and study-specific mean imputation to address any missing data for the included risk factors.

#### *Height*

Height was estimated in centimeters using data from self-report, and was rescaled to represent increments of 10 cm.

#### *Body mass index*

Body mass index (BMI) was defined using data from self-report of body weight (kg) and height (m<sup>2</sup>). BMI was rescaled to represent increments of 5 kg/m<sup>2</sup> (i.e., BMI/5), and BMI estimates <18.5 were recategorized as missing.

#### *Educational attainment*

Highest level of educational attainment was defined based on the highest level achieved, and categorized as follows: less than high school degree, high school degree or completed GED, some college or technical school, and college or graduate degree.

#### *Diabetes*

Type 2 diabetes was defined as a binary yes/no variable based on self-report.

#### *Sedentary lifestyle*

Sedentary lifestyle was retrospectively calculated by summing the hours per week of moderate and/or vigorous physical exercise, activity during leisure-time, and undifferentiated activities. Undifferentiated activities consisted of the following tasks: housework, gardening, walking, cycling, and physical exercise (e.g., aerobics, swimming, jogging, tennis, line dancing). After summation, the variable was categorized as “no” if the total sum was  $\geq 1$  hour/week, and “yes” if total sum was  $< 1$  hour/week.

#### *Pack-years of smoking*

Pack-years of smoking were estimated by multiplying the mean number of cigarette packs smoked per day by smoking duration in years, and were harmonized across studies using sex- and study-specific quartiles. Quartile cutoffs were based on study-specific distribution within the sex-specific controls. This variable was categorized as follows: “0” assigned for never-smokers, “1” assigned for  $\leq$  first quartile, “2” assigned for  $>$  first quartile but  $\leq$  second quartile, “3” assigned for  $>$  second quartile but  $\leq$  third quartile, and “4” assigned for  $>$  third quartile. In all analyses, pack-years of smoking was modelled as continuous variable.

#### *Alcohol consumption*

Alcoholic beverage consumption, represented by the grams of alcohol intake per day (g/day), was estimated by summing the daily intake of alcohol content per beverage. Individuals were subsequently categorized as follows: non- and occasional drinkers ( $< 1$  g/day), light-to-moderate drinkers (1-28 g/day), and heavy drinkers ( $>28$  g/day).

#### *Aspirin use*

Aspirin use was a binary variable and grouped as “yes” if an individual regularly used aspirin in the reference time period, and “no” otherwise.

#### *Nonsteroidal anti-inflammatory drug use*

Nonsteroidal anti-inflammatory drug (NSAID) use was a binary variable and grouped as “yes” if an individual regularly used non-aspirin NSAIDs in the reference time period, and “no” otherwise.

#### *Dietary factors*

Dietary variables were evaluated according to food frequency questionnaires (FFQs) or diet history. Fruit, vegetable, red meat, and processed meat consumption were measured by servings per day. While, fiber intake was expressed in terms of grams per day (g/day), total folate intake as micrograms per day ( $\mu\text{g}/\text{day}$ ), and total calcium intake as milligrams per day (mg/day). Total calcium intake (mg/day) was determined using both the mg/day of calcium consumption in foods (i.e., dietary) and through dietary supplements (i.e., single, multivitamins, and antacids), when available. Among studies that registered dietary supplement data as “regular user” versus “nonuser”, regular use of calcium supplements was assumed to be 500 mg/day, 500 mg/single tablet, or 130 mg/multivitamin tablet (i.e., the generic dose in supplements). Folate and folic acid consumption were determined based on  $\mu\text{g}/\text{day}$  of folate from foods (i.e., dietary folate) and  $\mu\text{g}/\text{day}$  of folic acid through dietary supplements (i.e., single or multivitamins), when available. In order to account for the greater bioavailability of synthetic folic acid compared with dietary folate intake, we estimated total folate intake using dietary folate equivalents (DFE), in which total  $\mu\text{g}$  DFE were equal to the sum of  $\mu\text{g}$  of dietary folate and 1.7 times the  $\mu\text{g}$  folic acid from dietary supplements. Further, since enrollment periods for several studies coincided or followed the inception period of folic acid fortification (1996-1998), these studies accounted for folic acid fortification when calculating DFE by entering dietary folate intake as the sum of  $\mu\text{g}$  of dietary folate due to natural sources and 1.7 times the  $\mu\text{g}$  folic acid from fortified foods. Among studies that registered dietary supplement data as “regular user” versus “nonuser”, regular use of folic acid supplements was assumed to be 400  $\mu\text{g}/\text{day}$  or 400  $\mu\text{g}/\text{multivitamin tablet}$  (i.e., the generic dose in supplements). Dietary variables were harmonized across studies using sex- and study-specific quartiles, with quartile cutoffs based on the distribution within the sex-specific controls of each respective study, and modelled as continuous factors. For studies with reduced variation in dietary intake, likely resulting from fewer dietary-related questions, dietary factors were only assigned to the 2nd and 3rd quartiles. Lastly, total energy consumption was defined as a continuous variable in kcal/day and rescaled using its standard error.

#### *Family history of CRC*

A positive family history of CRC was characterized as having one or more first-degree relatives diagnosed with CRC.

## Supplementary Tables

**Supplementary Table 1.** Study descriptions<sup>a</sup>

| Study Name                                                               | Design       | Country                                                                        | Reference Time | Cases | Controls |
|--------------------------------------------------------------------------|--------------|--------------------------------------------------------------------------------|----------------|-------|----------|
| Colon Cancer Family Registry (CCFR <sup>b</sup> )                        | Case-control | Canada, Australia, and United States                                           | 1996-2009      | 1,934 | 986      |
| Colorectal Cancer Genetics & Genomics, Spanish Study (CRCGEN)            | Case-control | Spain                                                                          | 1996-2015      | 54    | 97       |
| Darmkrebs: Chancen der Verhütung durch Screening (DACHS <sup>c,d</sup> ) | Case-control | Germany                                                                        | 2003-2015      | 163   | 118      |
| Diet, Activity and Lifestyle Study (DALSe)                               | Case-control | United States                                                                  | 1990-1993      | 83    | 89       |
| European Prospective Investigation into Cancer and Nutrition (EPIC)      | Cohort       | France, Germany, Greece, Italy, Netherlands, Spain, Sweden, and United Kingdom | 1992-1999      | 84    | 26       |
| Kentucky Case-Control Study (Kentucky <sup>f</sup> )                     | Case-control | United States                                                                  | 2001-2010      | 94    | 62       |
| Leeds Colorectal Cancer Study (LCCS)                                     | Case-control | United Kingdom                                                                 | 1997-2011      | 83    | 24       |
| Molecular Epidemiology of Colorectal Cancer (MECC <sup>g</sup> )         | Case-control | Israel                                                                         | 1998-2015      | 376   | 209      |
| North Carolina Colon Cancer Studies I (NCCCS I)                          | Case-control | United States                                                                  | 1997-2000      | 19    | 30       |
| North Carolina Colon Cancer Studies II (NCCCS II)                        | Case-control | United States                                                                  | 2002-2010      | 84    | 59       |
| Newfoundland Case-Control Study (NFCCR)                                  | Case-control | Canada                                                                         | 2000-2004      | 17    | 68       |
| Nurses' Health Study (NHS <sup>h</sup> )                                 | Cohort       | United States                                                                  | 1978-2013      | 36    | 60       |
| UK Biobank (UKB)                                                         | Cohort       | United Kingdom                                                                 | 2006-2010      | 459   | 2,062    |

<sup>a</sup>Reference time for each study was defined as patient selection or blood collection for cohort studies, and 1-2 years prior to selection for case-control studies. Only the years for included participants were reported

<sup>b</sup>Newcomb PA, et al. Colon Cancer Family Registry. Colon Cancer Family Registry: an international resource for studies of the genetic epidemiology of colon cancer. *Cancer Epidemiol Biomarkers Prev.* 2007 Nov;16(11):2331-43. UK = United Kingdom.

<sup>c</sup>Brenner H, et al. Protection from colorectal cancer after colonoscopy: a population-based, case-control study. *Ann Intern Med.* 2011 Jan 4;154(1):22-30.

<sup>d</sup>Lilla C, et al. Effect of NAT1 and NAT2 genetic polymorphisms on colorectal cancer risk associated with exposure to tobacco smoke and meat consumption. *Cancer Epidemiol Biomarkers Prev.* 2006 Jan;15(1):99-107.

<sup>e</sup>Slattery ML, et al. Energy balance and colon cancer--beyond physical activity. *Cancer Res.* 1997 Jan 1;57(1):75-80.

<sup>f</sup>Nock NL, et al. Associations between obesity and changes in adult BMI over time and colon cancer risk. *Obesity (Silver Spring).* 2008 May;16(5):1099-104.

<sup>g</sup>Poynter JN, et al. Statins and the risk of colorectal cancer. *N Engl J Med*. 2005 May 26;352(21):2184-92.

<sup>h</sup>Belanger CF, et al. The nurses' health study. *Am J Nurs*. 1978 Jun;78(6):1039-40.

**Supplementary Table 2.** Associations between environmental and lifestyle variables and risk of both early- late-onset colorectal cancer

| Variable <sup>a</sup>                                        | Men                         |                         | Women                       |                         |
|--------------------------------------------------------------|-----------------------------|-------------------------|-----------------------------|-------------------------|
|                                                              | Log-odds ratio <sup>b</sup> | Odds ratio <sup>b</sup> | Log-odds ratio <sup>b</sup> | Odds ratio <sup>b</sup> |
| <b>Anthropometric</b>                                        |                             |                         |                             |                         |
| BMI (per 5 kg/m <sup>2</sup> )                               | 0.226                       | 1.25                    | 0.107                       | 1.11                    |
| Height (per 10 cm)                                           | -0.008                      | 0.99                    | 0.074                       | 1.08                    |
| <b>Lifestyle</b>                                             |                             |                         |                             |                         |
| Pack-years of smoking                                        | 0.056                       | 1.06                    | 0.067                       | 1.07                    |
| Sedentary lifestyle                                          | -0.015                      | 0.99                    | -0.215                      | 0.81                    |
| <b>Alcohol use</b>                                           |                             |                         |                             |                         |
| 0 g/d                                                        | 0.080                       | 1.08                    | 0.120                       | 1.13                    |
| >28 g/d                                                      | 0.356                       | 1.43                    | 0.102                       | 1.11                    |
| <b>Lower educational attainment, highest level completed</b> |                             |                         |                             |                         |
| High school graduate or completed GED                        | 0.012                       | 1.01                    | -0.064                      | 0.94                    |
| Some college or technical school                             | -0.230                      | 0.79                    | -0.139                      | 0.87                    |
| ≥ College graduate                                           | -0.294                      | 0.75                    | -0.129                      | 0.88                    |
| History of diabetes                                          | 0.103                       | 1.11                    | 0.330                       | 1.39                    |
| <b>Dietary</b>                                               |                             |                         |                             |                         |
| Lower total folate intake (mcg/day) <sup>c</sup>             | -0.02                       | 0.98                    | -0.023                      | 0.98                    |
| Lower fruit intake (servings/day) <sup>c</sup>               | -0.033                      | 0.97                    | -0.003                      | 1.00                    |
| Lower vegetable intake (servings/day) <sup>c</sup>           | 0.097                       | 1.10                    | 0.045                       | 1.05                    |
| Greater red meat intake (servings/day) <sup>c</sup>          | 0.056                       | 1.06                    | 0.163                       | 1.18                    |
| Greater processed meat intake (servings/day) <sup>c</sup>    | 0.060                       | 1.06                    | -0.052                      | 0.95                    |
| Lower total fiber intake (g/day) <sup>c</sup>                | 0.045                       | 1.05                    | 0.009                       | 1.01                    |
| Lower total calcium intake (mg/day) <sup>c</sup>             | 0.043                       | 1.04                    | 0.063                       | 1.07                    |
| <b>Pharmacological</b>                                       |                             |                         |                             |                         |
| No aspirin use                                               | 0.359                       | 1.43                    | 0.258                       | 1.29                    |
| No NSAID use                                                 | 0.206                       | 1.23                    | 0.116                       | 1.12                    |

<sup>a</sup>The reference category was chosen in a way that it represents the lowest risk based on a minimally adjusted model. The referent category for each categorical factor was defined as the following: presence of a sedentary lifestyle (no), alcohol intake (1-28 g/day), educational attainment (< high school graduate), history of diabetes (no), aspirin use (yes), and NSAID use (yes). BMI = body mass index; GED = general educational development; NSAID = non-steroidal anti-inflammatory drug.

<sup>b</sup>The estimated weights, log-odds ratios, for the 16 variables used to construct the ERS were from a multivariable logistic regression model developed using 9,748 CRC cases and 10,590 controls without age restrictions (see Jeon J, Du M, Schoen RE, et al. Determining risk of colorectal cancer and starting age of screening based on lifestyle, environmental, and genetic factors. *Gastroenterology*. 2018;154(8):2152-64.e19). The ERS was built using the following 19 risk factors: height, body mass index, education, history of type 2 diabetes mellitus, smoking status, alcohol, regular aspirin use, regular NSAID use, regular use of post-menopausal hormones (women only), sex- and study-specific quartiles of smoking pack-years and dietary factors (intake of fiber, calcium, folate, processed meat, red meat, fruit, vegetable), total-energy consumption, and sedentary lifestyle. In addition, models were adjusted for study, age, family history, and endoscopy history. Notably, two lifestyle and environmental risk factors that were incorporated in the external multivariable model used for constructing the weights were excluded in the early-onset ERS: a) a dichotomous smoking variable, given that pack-years was already accounted for, and b) use of post-menopausal hormones, since this variable was not applicable to young individuals.

<sup>c</sup>Dietary variables were harmonized across studies by sex- and study-specific quartiles, and assigned values 0,1,2,3 in the order of increasing risk. These variables were treated as continuous variables in the analysis.

**Supplementary Table 3.** Associations between environmental and lifestyle variables and risk of early-onset colorectal cancer estimated using ridge regression

| Variable <sup>a</sup>                                     | Men            | Women          |
|-----------------------------------------------------------|----------------|----------------|
|                                                           | Log-odds ratio | Log-odds ratio |
| Anthropometric                                            |                |                |
| BMI (per 5 kg/m <sup>2</sup> )                            | 0.003          | 0.004          |
| Height (per 10 cm)                                        | 0.033          | 0.032          |
| Lifestyle                                                 |                |                |
| Pack-years of smoking                                     | 0.022          | 0.023          |
| Sedentary lifestyle                                       | -0.280         | -0.278         |
| Alcohol use (0 g/d)                                       | 0.220          | 0.220          |
| Alcohol use (>28 g/d)                                     | 0.071          | 0.070          |
| Lower educational attainment, highest level completed     | 0.043          | 0.043          |
| History of diabetes                                       | 0.122          | 0.122          |
| Dietary                                                   |                |                |
| Lower total folate intake (mcg/day) <sup>b</sup>          | 0.031          | 0.030          |
| Lower fruit intake (servings/day) <sup>b</sup>            | -0.009         | -0.009         |
| Lower vegetable intake (servings/day) <sup>b</sup>        | 0.055          | 0.055          |
| Greater red meat intake (servings/day) <sup>b</sup>       | 0.025          | 0.025          |
| Greater processed meat intake (servings/day) <sup>b</sup> | -0.098         | -0.098         |
| Lower total fiber intake (g/day) <sup>b</sup>             | -0.091         | -0.090         |
| Lower total calcium intake (mg/day) <sup>b</sup>          | 0.047          | 0.046          |
| Pharmacological                                           |                |                |
| No aspirin use                                            | -0.073         | -0.072         |
| No NSAID use                                              | 0.338          | 0.336          |

<sup>a</sup>The referent category for each categorical factor was defined as the following: presence of a sedentary lifestyle (no), alcohol intake (1-28 g/day), history of diabetes (no), aspirin use (yes), and NSAID use (yes). BMI = body mass index; NSAID = non-steroidal anti-inflammatory drug.

<sup>b</sup>Dietary variables were harmonized across studies by sex- and study-specific quartiles, and assigned values 0,1,2,3 in the order of increasing risk. These variables were treated as continuous variables in the analysis.



**Supplementary Table 4.** Odds ratio (95% CI) of ERS and PRS associated with early-onset CRC risk using repeated k-fold cross-validation (CV) and an ERS with weights derived from ridge regression in early-onset CRC<sup>a</sup>

| Model                                      | OR (95% CI)       | <i>P</i> <sup>b</sup> | K-fold CV Accuracy (SD) |
|--------------------------------------------|-------------------|-----------------------|-------------------------|
| Models with ERS as the predictor           |                   |                       |                         |
| Model 1: ERS per 1 SD <sup>c</sup>         | 1.15 (1.09, 1.21) | <0.001                | 0.725 (0.020)           |
| Model 2: ERS per quartile <sup>d</sup>     |                   |                       | 0.722 (0.021)           |
| 1                                          | Referent          | —                     | —                       |
| 2                                          | 1.16 (1.00, 1.35) | 0.06                  | —                       |
| 3                                          | 1.28 (1.10, 1.48) | 0.001                 | —                       |
| 4                                          | 1.47 (1.26, 1.71) | <0.001                | —                       |
| Models with both ERS and PRS as predictors |                   |                       |                         |
| Model 3 <sup>e</sup> :                     |                   |                       | 0.738 (0.022)           |
| ERS per 1 SD                               | 1.13 (1.07, 1.20) | <0.001                | —                       |
| PRS per 1 SD                               | 1.59 (1.50, 1.68) | <0.001                | —                       |
| Model 4 <sup>f</sup> :                     |                   |                       | 0.735 (0.008)           |
| ERS per quartile                           |                   |                       |                         |
| 1                                          | Referent          | —                     | —                       |
| 2                                          | 1.19 (1.01, 1.39) | 0.03                  | —                       |
| 3                                          | 1.27 (1.09, 1.49) | 0.002                 | —                       |
| 4                                          | 1.44 (1.23, 1.69) | <0.001                | —                       |
| PRS per quartile                           |                   |                       |                         |
| 1                                          | Referent          | —                     | —                       |
| 2                                          | 1.50 (1.28, 1.75) | <0.001                | —                       |
| 3                                          | 2.07 (1.77, 2.42) | <0.001                | —                       |
| 4                                          | 3.53 (3.01, 4.15) | <0.001                | —                       |

<sup>a</sup>Risks for early-onset CRC linked to the ERS and PRS were evaluated by ridge regression in 3,486 cases and 3,890 controls less than 50 years of age. CI = confidence interval; CV = cross-validation; ERS = environmental risk score; OR = odds ratio; PRS = polygenic risk score; SD = standard deviation.

<sup>b</sup>2-sided *P* values per the Wald test.

<sup>c</sup>The model includes age, sex, total energy consumption, study, family history, and a continuous z-transformed ERS.

<sup>d</sup>The model includes age, sex, total energy consumption, study, family history, and the ERS in quartiles.

<sup>e</sup>The model includes age, sex, total energy consumption, study, family history, principal components, genotype platform, and continuous z-transformed ERS and PRS.

<sup>f</sup>The model includes age, sex, total energy consumption, study, family history, principal components, genotype platform, and the ERS and PRS in quartiles.

**Supplementary Table 5.** Odds ratio (95% CI) of ERS and PRS associated with early-onset CRC risk using repeated k-fold cross-validation (CV) in the CCFR study

| Model                                      | OR (95% CI)       | <i>P</i> <sup>a</sup> | K-fold CV Accuracy (SD) |
|--------------------------------------------|-------------------|-----------------------|-------------------------|
| Models with ERS as the predictor           |                   |                       |                         |
| Model 1: ERS per 1 SD <sup>b</sup>         | 1.23 (1.13, 1.34) | <0.001                | 0.729 (0.012)           |
| Model 2: ERS by quartile <sup>c</sup>      |                   |                       | 0.729 (0.013)           |
| 1                                          | Referent          | —                     | —                       |
| 2                                          | 0.98 (0.77, 1.25) | 0.87                  | —                       |
| 3                                          | 1.24 (0.98, 1.57) | 0.08                  | —                       |
| 4                                          | 1.71 (1.33, 2.18) | <0.001                | —                       |
| Models with PRS as the predictor           |                   |                       |                         |
| Model 3: PRS per 1 SD <sup>d</sup>         | 1.52 (1.39, 1.66) | <0.001                | 0.736 (0.011)           |
| Model 4: PRS by quartile <sup>e</sup>      |                   |                       | 0.735 (0.298)           |
| 1                                          | Referent          | —                     | —                       |
| 2                                          | 1.41 (1.12, 1.77) | 0.004                 | —                       |
| 3                                          | 2.09 (1.65, 2.66) | <0.001                | —                       |
| 4                                          | 3.14 (2.43, 4.06) | <0.001                | —                       |
| Models with both ERS and PRS as predictors |                   |                       |                         |
| Model 5 <sup>f</sup> :                     |                   |                       | 0.740 (0.013)           |
| ERS per 1 SD                               | 1.20 (1.10, 1.32) | <0.001                | —                       |
| PRS per 1 SD                               | 1.53 (1.40, 1.67) | <0.001                | —                       |
| Model 6 <sup>g</sup> :                     |                   |                       | 0.733 (0.023)           |
| ERS by quartile                            |                   |                       |                         |
| 1                                          | Referent          | —                     | —                       |
| 2                                          | 0.95 (0.74, 1.22) | 0.69                  | —                       |
| 3                                          | 1.21 (0.95, 1.55) | 0.12                  | —                       |
| 4                                          | 1.61 (1.25, 2.07) | <0.001                | —                       |
| PRS by quartile                            |                   |                       |                         |
| 1                                          | Referent          | —                     | —                       |
| 2                                          | 1.39 (1.09, 1.75) | 0.007                 | —                       |
| 3                                          | 2.13 (1.67, 2.72) | <0.001                | —                       |
| 4                                          | 3.09 (2.38, 4.02) | <0.001                | —                       |

<sup>a</sup>2-sided *P* values per the Wald test. CI = confidence interval; CV = cross-validation; ERS = environmental risk score; OR = odds ratio; PRS = polygenic risk score; SD = standard deviation.

<sup>b</sup>The model includes age, sex, total energy consumption, family history, and a continuous z-transformed ERS.

<sup>c</sup>The model includes age, sex, total energy consumption, family history, and the ERS in quartiles.

<sup>d</sup>The model includes age, sex, genotype platform, family history, principal components, and a continuous z-transformed PRS.

<sup>e</sup>The model includes age, sex, genotype platform, family history, principal components, and the PRS in quartiles.

<sup>f</sup>The model includes age, sex, total energy consumption, family history, principal components, genotype platform, and continuous z-transformed ERS and PRS.

<sup>g</sup>The model includes age, sex, total energy consumption, family history, principal components, genotype platform, and the ERS and PRS in quartiles.

**Supplementary Table 6.** Associations between 141 risk variants and risk of colorectal cancer in the study population

| SNP         | Locus   | Risk/other allele | Risk allele freq | PMID     | <i>P</i> <sup>a</sup> | Unadjusted log-odds ratio (95% CI) | Adjusted log-odds ratio (95% CI) <sup>b</sup> |
|-------------|---------|-------------------|------------------|----------|-----------------------|------------------------------------|-----------------------------------------------|
| rs72647484  | 1p36.12 | T/C               | 0.9107           | 25990418 | 0.002                 | 0.0504 (0.0192, 0.0816)            | --                                            |
| rs4360494   | 1p34.3  | G/C               | 0.4539           | 30510241 | <0.001                | 0.0523 (0.0349, 0.0697)            | 0.0379 (0.0013, 0.0689)                       |
| rs12144319  | 1p32.3  | C/T               | 0.2548           | 30510241 | <0.001                | 0.0665 (0.0469, 0.0861)            | 0.0661 (0.0338, 0.0861)                       |
| rs7542665   | 1p31.3  | C/T               | 0.273            | 30529582 | <0.001                | 0.0770 (--, --)                    | --                                            |
| rs6678517   | 1q25.3  | A/G               | 0.5898           | 24737748 | <0.001                | 0.0730 (0.0556, 0.0904)            | --                                            |
| rs17011141  | 1q41    | G/A               | 0.2087           | 20972440 | <0.001                | 0.0877 (0.0665, 0.1089)            | --                                            |
| rs7606562   | 2p16.3  | T/A               | 0.813            | 30529582 | <0.001                | 0.0953 (--, --)                    | --                                            |
| rs11692435  | 2q11.2  | G/A               | 0.9              | 31089142 | <0.001                | 0.1133 (--, --)                    | --                                            |
| rs448513    | 2q24.2  | C/T               | 0.326            | 30510241 | <0.001                | 0.0511 (0.0329, 0.0693)            | 0.0054 (0.0008, 0.0578)                       |
| rs11884596  | 2q33.1  | C/T               | 0.3823           | 30510241 | <0.001                | 0.0535 (0.0355, 0.0715)            | 0.0342 (0.0012, 0.0330)                       |
| rs983402    | 2q33.1  | T/C               | 0.3312           | 30510241 | <0.001                | 0.0627 (0.0441, 0.0813)            | 0.0622 (0.0300, 0.0813)                       |
| rs3731861   | 2q35    | T/C               | 0.6295           | 27005424 | <0.001                | 0.0613 (0.0435, 0.0791)            | --                                            |
| rs35470271  | 3p22.1  | G/A               | 0.154            | 26151821 | <0.001                | 0.0994 (0.0759, 0.1229)            | --                                            |
| rs9831861   | 3p21.1  | G/T               | 0.59             | 31089142 | <0.001                | 0.0677 (--, --)                    | --                                            |
| rs6781752   | 3p14.1  | A/G               | 0.205            | 26151821 | <0.001                | 0.0597 (0.0379, 0.0815)            | --                                            |
| rs13086367  | 3q13.2  | A/G               | 0.5262           | 30510241 | <0.001                | 0.0474 (0.0302, 0.0646)            | 0.0463 (0.0106, 0.0646)                       |
| rs12635946  | 3q13.2  | C/T               | 0.62             | 31089142 | <0.001                | 0.0770 (--, --)                    | --                                            |
| rs72942485  | 3q13.2  | G/A               | 0.9802           | 30510241 | <0.001                | 0.1761 (0.1153, 0.2369)            | 0.0545 (0.0028, 0.2254)                       |
| rs10049390  | 3q22.2  | A/G               | 0.7353           | 30510241 | <0.001                | 0.0597 (0.0399, 0.0795)            | 0.0455 (0.0017, 0.0788)                       |
| rs113569514 | 3q22.2  | T/C               | 0.62             | 30529582 | <0.001                | 0.0953 (--, --)                    | --                                            |
| rs9876206   | 3q26.2  | C/T               | 0.7507           | 20972440 | <0.001                | 0.0453 (0.0255, 0.0651)            | --                                            |
| rs13149359  | 4q22.2  | A/C               | 0.3663           | 29917119 | <0.001                | 0.0520 (0.0342, 0.0698)            | --                                            |
| rs1391441   | 4q24    | A/G               | 0.672            | 30510241 | <0.001                | 0.0522 (0.0342, 0.0702)            | 0.0148 (0.0008, 0.0667)                       |
| rs11727676  | 4q31.21 | C/T               | 0.098            | 30510241 | <0.001                | 0.0842 (0.0544, 0.1140)            | 0.0093 (0.0013, 0.0990)                       |
| rs78368589  | 5p15.33 | T/C               | 0.0597           | 30510241 | <0.001                | 0.1119 (0.0745, 0.1493)            | 0.0786 (0.0027, 0.1474)                       |
| rs2735940   | 5p15.33 | G/A               | 0.4952           | 29917119 | <0.001                | 0.0865 (0.0691, 0.1039)            | --                                            |
| rs7708610   | 5p13.1  | A/G               | 0.3564           | 30510241 | <0.001                | 0.0545 (0.0363, 0.0727)            | 0.0384 (0.0013, 0.0718)                       |
| rs12514517  | 5p13.1  | A/G               | 0.288            | 29917119 | <0.001                | 0.1013 (0.0819, 0.1207)            | --                                            |
| rs145364999 | 5q21.1  | T/A               | 0.9969           | 30510241 | <0.001                | 0.5559 (0.3683, 0.7435)            | 0.3496 (0.0118, 0.7297)                       |
| rs755229494 | 5q22.2  | G/A               | 0.0011           | 29917119 | <0.001                | 0.6286 (0.4534, 0.8038)            | --                                            |
| rs12659017  | 5q23.2  | G/A               | 0.232            | 30529582 | <0.001                | 0.0862 (--, --)                    | --                                            |
| rs4976270   | 5q31.1  | C/T               | 0.5501           | 23263487 | <0.001                | 0.0693 (0.0521, 0.0865)            | --                                            |
| rs2070699   | 6p24.1  | T/G               | 0.48             | 31089142 | <0.001                | 0.0677 (--, --)                    | --                                            |
| rs1476570   | 6p22.1  | A/G               | 0.376            | 30529582 | <0.001                | 0.1133 (--, --)                    | --                                            |
| rs3131043   | 6p21.33 | G/A               | 0.43             | 31089142 | <0.001                | 0.0677 (--, --)                    | --                                            |
| rs116353863 | 6p21.33 | C/T               | 0.0165           | 30510241 | <0.001                | 0.1545 (0.0932, 0.2158)            | 0.1202 (0.0062, 0.2144)                       |

|             |          |     |        |          |        |                         |                         |
|-------------|----------|-----|--------|----------|--------|-------------------------|-------------------------|
| rs116685461 | 6p21.33  | G/A | 0.8755 | 30510241 | <0.001 | 0.0698 (0.0435, 0.0961) | 0.0655 (0.0057, 0.0960) |
| rs2516420   | 6p21.33  | C/T | 0.9263 | 30510241 | <0.001 | 0.1118 (0.0775, 0.1461) | 0.1091 (0.0931, 0.1460) |
| rs3830041   | 6p21.32  | T/C | 0.14   | 30529582 | <0.001 | 0.1484 (--, --)         | --                      |
| rs9271695   | 6p21.32  | G/A | 0.7954 | 30510241 | <0.001 | 0.0889 (0.0658, 0.1120) | 0.0889 (0.0649, 0.0930) |
| rs16878812  | 6p21.31  | A/G | 0.8861 | 29917119 | <0.001 | 0.0778 (0.0502, 0.1054) | --                      |
| rs9470361   | 6p21.2   | A/G | 0.2488 | 22634755 | <0.001 | 0.0540 (0.0342, 0.0738) | --                      |
| rs62396735  | 6p21.1   | C/T | 0.2908 | 26965516 | <0.001 | 0.0330 (0.0142, 0.0518) | --                      |
| rs2079660   | 6q21     | C/A | NA     | 31089142 | <0.001 | 0.0322 (--, --)         | --                      |
| rs13204733  | 6p12.1   | G/A | 0.141  | 30510241 | <0.001 | 0.0680 (0.0425, 0.0935) | 0.0643 (0.0060, 0.0934) |
| rs62404966  | 6p12.1   | C/T | 0.7623 | 29917119 | <0.001 | 0.0724 (0.0514, 0.0934) | --                      |
| rs12672022  | 7p13     | T/C | 0.8345 | 30510241 | <0.001 | 0.0650 (0.0417, 0.0883) | 0.0067 (0.0010, 0.0714) |
| rs80077929  | 7p12.3   | T/C | 0.1107 | 30510241 | <0.001 | 0.0643 (0.0359, 0.0927) | 0.0093 (0.0017, 0.0764) |
| rs10951878  | 7p12.3   | C/T | 0.49   | 31089142 | <0.001 | 0.0583 (--, --)         | --                      |
| rs3801081   | 7p12.3   | G/A | 0.68   | 31089142 | <0.001 | 0.0770 (--, --)         | --                      |
| rs16892766  | 8q23.3   | C/A | 0.0829 | 26965516 | <0.001 | 0.2099 (0.1723, 0.2475) | --                      |
| rs6469654   | 8q23.3   | G/C | 0.2288 | 18372905 | <0.001 | 0.0677 (0.0436, 0.0918) | --                      |
| rs117079142 | 8q24.11  | A/C | 0.0432 | 26965516 | <0.001 | 0.1139 (0.0688, 0.1590) | --                      |
| rs6983267   | 8q24.21  | G/T | 0.5228 | 17618284 | <0.001 | 0.1052 (0.0795, 0.1309) | --                      |
| rs7013278   | 8q24.21  | T/C | 0.3761 | 30510241 | <0.001 | 0.0606 (0.0341, 0.0871) | 0.0091 (0.0016, 0.0748) |
| rs4313119   | 8q24.21  | G/T | 0.7486 | 30510241 | <0.001 | 0.0608 (0.0410, 0.0806) | 0.0518 (0.0023, 0.0803) |
| rs1537372   | 9p21.3   | G/T | 0.5692 | 30510241 | <0.001 | 0.0504 (0.0330, 0.0678) | 0.0120 (0.0008, 0.0641) |
| rs34405347  | 9q22.33  | T/G | 0.9034 | 30510241 | <0.001 | 0.0818 (0.0528, 0.1108) | 0.0089 (0.0013, 0.0952) |
| rs10980628  | 9q31.3   | C/T | 0.2106 | 30510241 | <0.001 | 0.0637 (0.0427, 0.0847) | 0.0511 (0.0020, 0.0841) |
| rs12217641  | 10p14    | C/T | 0.6981 | 30510241 | <0.001 | 0.0462 (0.0260, 0.0664) | 0.0069 (0.0012, 0.0569) |
| rs11255841  | 10p14    | T/A | 0.703  | 18372905 | <0.001 | 0.1064 (0.0864, 0.1264) | --                      |
| rs10821907  | 10q11.23 | C/T | 0.8276 | 29917119 | <0.001 | 0.0730 (0.0501, 0.0959) | --                      |
| rs704017    | 10q22.3  | G/A | 0.5846 | 24836286 | <0.001 | 0.0765 (0.0589, 0.0941) | --                      |
| rs1250567   | 10q22.3  | C/T | 0.4405 | 30510241 | <0.001 | 0.0483 (0.0307, 0.0659) | 0.0470 (0.0097, 0.0659) |
| rs10786560  | 10q24.2  | G/A | 0.762  | 30510241 | <0.001 | 0.0514 (0.0293, 0.0735) | 0.0082 (0.0013, 0.0659) |
| rs11190164  | 10q24.2  | G/A | 0.2626 | 24737748 | <0.001 | 0.0889 (0.0685, 0.1093) | --                      |
| rs12246635  | 10q25.2  | C/T | 0.0983 | 25105248 | <0.001 | 0.0975 (0.0693, 0.1257) | --                      |
| rs11196170  | 10q25.2  | A/G | 0.2178 | 24836286 | <0.001 | 0.0527 (0.0319, 0.0735) | --                      |
| rs4450168   | 11p15.4  | C/A | 0.17   | 31089142 | <0.001 | 0.0953 (--, --)         | --                      |
| rs174533    | 11q12.2  | G/A | 0.6739 | 24836286 | <0.001 | 0.0636 (0.0452, 0.0820) | --                      |
| rs7121958   | 11q13.4  | G/T | 0.5105 | 22634755 | <0.001 | 0.0780 (0.0608, 0.0952) | --                      |
| rs7946853   | 11q13.4  | C/T | 0.8624 | 30510241 | <0.001 | 0.0603 (0.0348, 0.0858) | 0.0119 (0.0016, 0.0807) |
| rs61389091  | 11q13.4  | C/T | 0.9606 | 30510241 | <0.001 | 0.1934 (0.1469, 0.2399) | 0.1934 (0.1469, 0.2399) |
| rs55864876  | 11q22.1  | G/A | 0.9184 | 30510241 | <0.001 | 0.0774 (0.0447, 0.1101) | 0.0150 (0.0020, 0.1035) |
| rs2186607   | 11q22.1  | T/A | 0.5178 | 30510241 | <0.001 | 0.0537 (0.0365, 0.0709) | 0.0483 (0.0028, 0.0708) |
| rs3087967   | 11q23.1  | T/C | 0.2911 | 18372901 | <0.001 | 0.1122 (0.0934, 0.1310) | --                      |

|             |          |     |        |                   |        |                          |                         |
|-------------|----------|-----|--------|-------------------|--------|--------------------------|-------------------------|
| rs35808169  | 12p13.32 | C/T | 0.1721 | 23263487          | <0.001 | 0.0890 (0.0661, 0.1119)  | --                      |
| rs3217810   | 12p13.32 | T/C | 0.1253 | 24737748          | <0.001 | 0.1181 (0.0891, 0.1471)  | --                      |
| rs3217874   | 12p13.32 | T/C | 0.4282 | 30510241          | <0.001 | 0.0550 (0.0370, 0.0730)  | 0.0453 (0.0019, 0.0726) |
| rs10849433  | 12p13.31 | C/T | 0.267  | 30510241          | <0.001 | 0.0510 (0.0316, 0.0704)  | 0.0468 (0.0034, 0.0703) |
| rs2250430   | 12p13.31 | T/A | 0.7095 | 24836286          | <0.001 | 0.0597 (0.0399, 0.0795)  | --                      |
| rs2710310   | 12p13.2  | C/T | 0.7596 | 27145994          | 0.16   | 0.0145 (-0.0057, 0.0347) | --                      |
| rs77969132  | 12p11.21 | T/C | 0.015  | 30529582          | <0.001 | 0.3646 (--, --)          | --                      |
| rs11610543  | 12q12    | G/A | 0.5013 | 30510241          | <0.001 | 0.0530 (0.0359, 0.0701)  | 0.0474 (0.0026, 0.0699) |
| rs12372718  | 12q13.12 | G/A | 0.3924 | 20972440          | <0.001 | 0.0896 (0.0720, 0.1072)  | --                      |
| rs4759277   | 12q13.3  | A/C | 0.3546 | 30510241          | <0.001 | 0.0530 (0.0350, 0.0710)  | 0.0285 (0.0010, 0.0692) |
| rs597808    | 12q24.12 | G/A | 0.5166 | 26151821          | <0.001 | 0.0737 (0.0561, 0.0913)  | --                      |
| rs1427760   | 12q24.21 | C/T | 0.5268 | 30510241          | <0.001 | 0.0456 (0.0284, 0.0628)  | 0.0424 (0.0034, 0.0628) |
| rs7300312   | 12q24.21 | C/T | 0.5719 | 29917119          | <0.001 | 0.0660 (0.0488, 0.0832)  | --                      |
| rs55990915  | 12q24.22 | A/C | 0.1222 | 26151821          | <0.001 | 0.0640 (--, --)          | --                      |
| rs377429877 | 13q13.2  | C/T | 0.6117 | 29917119          | <0.001 | 0.0468 (0.0288, 0.0648)  | --                      |
| rs7333607   | 13q13.3  | G/A | 0.235  | 30510241          | <0.001 | 0.0758 (0.0552, 0.0964)  | 0.0758 (0.0527, 0.0964) |
| rs45597035  | 13q22.1  | A/G | 0.6506 | 30510241;31089142 | <0.001 | 0.0505 (0.0323, 0.0687)  | 0.0495 (0.0135, 0.0687) |
| rs78341008  | 13q22.1  | C/T | 0.0719 | 30510241          | <0.001 | 0.0982 (0.0635, 0.1329)  | 0.0109 (0.0015, 0.1163) |
| rs1924816   | 13q22.1  | A/G | 0.7737 | 30510241          | <0.001 | 0.0544 (0.0338, 0.0750)  | 0.0506 (0.0040, 0.0749) |
| rs1330889   | 13q22.3  | C/T | 0.87   | 31089142          | <0.001 | 0.1044 (--, --)          | --                      |
| rs8000189   | 13q34    | T/C | 0.6401 | 30510241          | <0.001 | 0.0549 (0.0371, 0.0727)  | 0.0473 (0.0022, 0.0725) |
| rs1951864   | 14q22.2  | A/G | 0.3722 | 30510241          | <0.001 | 0.0407 (0.0227, 0.0587)  | 0.0059 (0.0011, 0.0480) |
| rs35107139  | 14q22.2  | C/A | 0.4235 | 19011631          | <0.001 | 0.0912 (0.0734, 0.1090)  | --                      |
| rs4901473   | 14q22.2  | G/A | 0.378  | 21655089          | <0.001 | 0.0465 (0.0287, 0.0643)  | --                      |
| rs17094983  | 14q23.1  | G/A | 0.8773 | 30510241          | <0.001 | 0.0691 (0.0415, 0.0967)  | 0.0062 (0.0013, 0.0424) |
| rs8020436   | 14q23.1  | A/G | 0.4016 | 30510241          | <0.001 | 0.0454 (0.0270, 0.0638)  | 0.0294 (0.0015, 0.0629) |
| rs12708491  | 15q13.3  | G/A | 0.5872 | 21655089          | <0.001 | 0.0464 (0.0278, 0.0650)  | --                      |
| rs2293581   | 15q13.3  | A/G | 0.2116 | 21655089          | <0.001 | 0.1248 (0.1030, 0.1466)  | --                      |
| rs17816465  | 15q13.3  | A/G | 0.2055 | 30510241          | <0.001 | 0.0705 (0.0489, 0.0921)  | 0.0690 (0.0238, 0.0680) |
| rs12594720  | 15q22.31 | C/G | 0.7218 | 30510241;31089142 | <0.001 | 0.0476 (0.0280, 0.0672)  | 0.0246 (0.0014, 0.0656) |
| rs56324967  | 15q22.33 | C/T | 0.6757 | 30510241          | <0.001 | 0.0689 (0.0505, 0.0873)  | 0.0689 (0.0490, 0.0873) |
| rs745213    | 15q23    | G/T | 0.8102 | 30510241          | <0.001 | 0.0490 (0.0274, 0.0706)  | 0.0072 (0.0013, 0.0591) |
| rs7495132   | 15q26.1  | T/C | 0.12   | 31089142          | <0.001 | 0.1044 (--, --)          | --                      |
| rs9924886   | 16q22.1  | A/C | 0.7321 | 19011631          | <0.001 | 0.0550 (0.0356, 0.0744)  | --                      |
| rs9930005   | 16q23.2  | C/A | 0.4303 | 30510241          | <0.001 | 0.0498 (0.0324, 0.0672)  | 0.0061 (0.0008, 0.0610) |
| rs12447408  | 16q24.1  | A/G | 0.2535 | 30510241          | <0.001 | 0.0472 (0.0270, 0.0674)  | 0.0079 (0.0012, 0.0616) |
| rs12149163  | 16q24.1  | T/C | 0.4976 | 29917119          | <0.001 | 0.0487 (0.0315, 0.0659)  | --                      |
| rs62042090  | 16q24.1  | T/C | 0.2164 | 25990418          | <0.001 | 0.0481 (0.0271, 0.0691)  | --                      |
| rs4968127   | 17p13.3  | G/A | 0.3684 | 24836286          | <0.001 | 0.0514 (0.0328, 0.0700)  | --                      |
| rs73975586  | 17p13.3  | A/T | 0.8732 | 30510241          | <0.001 | 0.0680 (0.0408, 0.0952)  | 0.0497 (0.0025, 0.0944) |

|             |          |     |        |          |        |                         |                         |
|-------------|----------|-----|--------|----------|--------|-------------------------|-------------------------|
| rs1078643   | 17p12    | A/G | 0.7636 | 30510241 | <0.001 | 0.0748 (0.0534, 0.0962) | 0.0747 (0.0452, 0.0765) |
| rs983318    | 17q24.3  | A/G | 0.2526 | 30510241 | <0.001 | 0.0595 (0.0395, 0.0795) | 0.0397 (0.0013, 0.0783) |
| rs373585858 | 17q25.3  | A/G | 0.0016 | 30510241 | <0.001 | 0.6995 (0.3977, 1.0013) | 0.1103 (0.0183, 0.8932) |
| rs75954926  | 17q25.3  | G/A | 0.6568 | 30510241 | <0.001 | 0.0882 (0.0684, 0.1080) | 0.0882 (0.0684, 0.0923) |
| rs11874392  | 18q21.1  | A/T | 0.545  | 17934461 | <0.001 | 0.1606 (0.1434, 0.1778) | --                      |
| rs34797592  | 19p13.11 | T/C | 0.1182 | 30510241 | <0.001 | 0.0868 (0.0596, 0.1140) | 0.0824 (0.0139, 0.1139) |
| rs28840750  | 19q13.11 | T/G | 0.948  | 19011631 | <0.001 | 0.1939 (0.1555, 0.2323) | --                      |
| rs1963413   | 19q13.2  | A/G | 0.6119 | 24836286 | <0.001 | 0.0441 (0.0265, 0.0617) | --                      |
| rs12979278  | 19q13.33 | T/C | 0.53   | 31089142 | <0.001 | 0.0677 (--, --)         | --                      |
| rs73068325  | 19q13.43 | T/C | 0.1826 | 30510241 | <0.001 | 0.0632 (0.0407, 0.0857) | 0.0066 (0.0010, 0.0716) |
| rs189583    | 20p12.3  | G/C | 0.3298 | 19011631 | <0.001 | 0.0795 (0.0607, 0.0983) | --                      |
| rs994308    | 20p12.3  | C/T | 0.5939 | 30510241 | <0.001 | 0.0627 (0.0449, 0.0805) | 0.0626 (0.0385, 0.0805) |
| rs4813802   | 20p12.3  | G/T | 0.3561 | 21655089 | <0.001 | 0.0819 (0.0635, 0.1003) | --                      |
| rs28488     | 20p12.3  | T/C | 0.6388 | 30510241 | <0.001 | 0.0714 (0.0530, 0.0898) | 0.0714 (0.0525, 0.0747) |
| rs11087784  | 20p12.3  | G/A | 0.1523 | 23263487 | <0.001 | 0.0874 (0.0639, 0.1109) | --                      |
| rs556532366 | 20p12.3  | T/C | 0.0029 | 30510241 | <0.001 | 0.4760 (0.2682, 0.6838) | 0.0715 (0.0126, 0.5885) |
| rs6058093   | 20q11.22 | C/A | 0.4942 | 29917119 | <0.001 | 0.0450 (0.0278, 0.0622) | --                      |
| rs6031311   | 20q13.12 | T/C | 0.7591 | 30510241 | <0.001 | 0.0597 (0.0395, 0.0799) | 0.0362 (0.0012, 0.0350) |
| rs6066825   | 20q13.13 | A/G | 0.6448 | 26151821 | <0.001 | 0.0719 (0.0539, 0.0899) | --                      |
| rs6067417   | 20q13.13 | C/T | 0.5635 | 30510241 | <0.001 | 0.0446 (0.0268, 0.0624) | 0.0331 (0.0017, 0.0619) |
| rs6063514   | 20q13.13 | C/T | 0.6086 | 29917119 | <0.001 | 0.0547 (0.0367, 0.0727) | --                      |
| rs6091189   | 20q13.13 | T/C | 0.1529 | 30510241 | <0.001 | 0.0620 (0.0381, 0.0859) | 0.0549 (0.0035, 0.0857) |
| rs13831     | 20q13.32 | G/A | 0.684  | 30529582 | <0.001 | 0.0770 (--, --)         | --                      |
| rs1741640   | 20q13.33 | C/T | 0.7652 | 20972440 | <0.001 | 0.1146 (0.0936, 0.1356) | --                      |
| rs2738783   | 20q13.33 | T/G | 0.2029 | 30510241 | <0.001 | 0.0593 (0.0379, 0.0807) | 0.0060 (0.0009, 0.0637) |

<sup>a</sup>2-sided *P* values per the Wald test. CI = confidence interval; SNP = single nucleotide polymorphism; PMID = PubMed identification.

<sup>b</sup>Adjusted for “winner’s curse” (Zhong H, Prentice RL. Bias-reduced estimators and confidence intervals for odds ratios in genome-wide association studies. *Biostatistics*. 2008 Oct;9(4):621-34) given that these variants were initially discovered in GECCO and CORECT studies, which provides conservatively attenuated estimates for these risk variants.

**Supplementary Table 7.** CRC incidence (cases per 100,000) for non-Hispanic White individuals in SEER13 (1992-2005)<sup>a</sup>

| Age, years | CRC incidence (cases per 100,000) |       |
|------------|-----------------------------------|-------|
|            | Men                               | Women |
| 0          | 0                                 | 0     |
| 1          | 0                                 | 0     |
| 2          | 0                                 | 0     |
| 3          | 0                                 | 0     |
| 4          | 0                                 | 0.1   |
| 5          | 0                                 | 0     |
| 6          | 0                                 | 0     |
| 7          | 0                                 | 0     |
| 8          | 0                                 | 0     |
| 9          | 0.2                               | 0     |
| 10         | 0                                 | 0     |
| 11         | 0.1                               | 0.1   |
| 12         | 0.1                               | 0.1   |
| 13         | 0.1                               | 0.2   |
| 14         | 0.2                               | 0.2   |
| 15         | 0.3                               | 0.3   |
| 16         | 0.2                               | 0.3   |
| 17         | 0.3                               | 0.4   |
| 18         | 0.5                               | 0.4   |
| 19         | 0.6                               | 0.5   |
| 20         | 0.4                               | 0.5   |
| 21         | 0.9                               | 0.8   |
| 22         | 1                                 | 1.4   |
| 23         | 1.1                               | 1.1   |
| 24         | 0.9                               | 1.4   |
| 25         | 1.6                               | 1.8   |
| 26         | 1.8                               | 1.7   |
| 27         | 1.4                               | 2     |
| 28         | 2.5                               | 2.3   |
| 29         | 3.1                               | 2.3   |
| 30         | 3.1                               | 2.8   |
| 31         | 3                                 | 3.5   |
| 32         | 3.8                               | 3.4   |
| 33         | 5.6                               | 5     |
| 34         | 5                                 | 4.8   |
| 35         | 5.9                               | 5.5   |
| 36         | 6.3                               | 5.4   |
| 37         | 7.9                               | 6.4   |
| 38         | 9                                 | 7.3   |
| 39         | 10.6                              | 8.8   |
| 40         | 11.4                              | 10.6  |
| 41         | 12.2                              | 12.1  |
| 42         | 14.9                              | 14.3  |
| 43         | 17.4                              | 14.6  |
| 44         | 18.8                              | 16.2  |
| 45         | 21.8                              | 19.1  |
| 46         | 24.9                              | 21.5  |
| 47         | 28.3                              | 24.2  |
| 48         | 33.2                              | 25.5  |
| 49         | 34.8                              | 28.6  |

|     |       |       |
|-----|-------|-------|
| 50  | 54.2  | 41.5  |
| 51  | 55.4  | 42.5  |
| 52  | 53.7  | 39.7  |
| 53  | 56.7  | 42.3  |
| 54  | 63.1  | 44.9  |
| 55  | 68.3  | 49.8  |
| 56  | 76.7  | 50.6  |
| 57  | 77.4  | 57.2  |
| 58  | 86.3  | 59.6  |
| 59  | 93.9  | 67.5  |
| 60  | 106.9 | 71.1  |
| 61  | 113.1 | 78.7  |
| 62  | 121.9 | 79.5  |
| 63  | 131.4 | 88.4  |
| 64  | 140.4 | 98.7  |
| 65  | 163   | 112.5 |
| 66  | 172.1 | 116.5 |
| 67  | 184.3 | 123.5 |
| 68  | 193.8 | 130.4 |
| 69  | 207.9 | 148.5 |
| 70  | 225.6 | 158.5 |
| 71  | 234   | 169   |
| 72  | 255.4 | 185.1 |
| 73  | 272.7 | 194.1 |
| 74  | 280.3 | 213.5 |
| 75  | 284.5 | 218   |
| 76  | 316.8 | 227.9 |
| 77  | 320.3 | 245.7 |
| 78  | 337.6 | 266.1 |
| 79  | 341.9 | 264.1 |
| 80  | 358   | 283.2 |
| 81  | 365.5 | 296.9 |
| 82  | 373.6 | 309   |
| 83  | 395.1 | 323.2 |
| 84  | 408   | 321.9 |
| 85+ | 400.7 | 339.9 |

---

<sup>a</sup>CRC = colorectal cancer; SEER = surveillance, epidemiology, and end results.



**Supplementary Table 8.** Colorectal cancer (CRC) mortality (deaths per 100,000) for non-Hispanic White individuals in SEER13 (1992-2005)

| Age, years | CRC mortality (deaths per 100,000) |                           |       |                           |
|------------|------------------------------------|---------------------------|-------|---------------------------|
|            | Men                                |                           | Women |                           |
|            | CRC                                | Other-causes <sup>a</sup> | CRC   | Other-causes <sup>a</sup> |
| 0          | 0                                  | 650.6                     | 0     | 531.1                     |
| 1-4        | 0                                  | 32.1                      | 0     | 25.6                      |
| 5-9        | 0                                  | 15.6                      | 0     | 12.3                      |
| 10-14      | 0                                  | 20.8                      | 0     | 14                        |
| 15-19      | 0                                  | 82.1                      | 0     | 36.2                      |
| 20-24      | 0                                  | 127.5                     | 0     | 44                        |
| 25-29      | 0                                  | 131.6                     | 0     | 51.9                      |
| 30-34      | 0.1                                | 153.4                     | 0.1   | 68.4                      |
| 35-39      | 0.2                                | 194.8                     | 0.2   | 98.4                      |
| 40-44      | 0.4                                | 271.4                     | 0.4   | 147.9                     |
| 45-49      | 0.8                                | 396.8                     | 0.6   | 226.2                     |
| 50-54      | 1.3                                | 590.4                     | 0.8   | 344.2                     |
| 55-59      | 1.8                                | 878.8                     | 1.1   | 521.2                     |
| 60-64      | 2.7                                | 1330.9                    | 1.5   | 815.2                     |
| 65-69      | 4.3                                | 2024.5                    | 2.3   | 1281.3                    |
| 70-74      | 6                                  | 3168.5                    | 3.4   | 2060.7                    |
| 75-79      | 6.8                                | 4992.9                    | 4.1   | 3354.1                    |
| 80-84      | 5.9                                | 8077.9                    | 3.9   | 5689.8                    |
| 85+        | 5.4                                | 16170.8                   | 4.6   | 13791.7                   |

<sup>a</sup>The other-cause mortality was computed by subtracting the CRC mortality from the all-cause mortality. SEER = surveillance, epidemiology, and end results.

**Supplementary Table 9.** Odds ratio (95% CI) of ERS and PRS associated with early-onset CRC risk across anatomic subsites using multinomial logistic regression

| Anatomic Site                      | ERS per 1 SD                      | PRS per 1 SD                      |
|------------------------------------|-----------------------------------|-----------------------------------|
| Proximal Colon Cancer <sup>a</sup> |                                   |                                   |
| OR (95% CI)                        | 1.13 (1.04, 1.22)                 | 1.38 (1.27, 1.50)                 |
| <i>P</i> <sup>b</sup>              | 0.003                             | <0.001                            |
| Covariate-adjusted AUC (95% CI)    | 0.542 (0.499, 0.584) <sup>d</sup> | 0.592 (0.554, 0.630) <sup>e</sup> |
| Distal Colon Cancer <sup>a</sup>   |                                   |                                   |
| OR (95% CI)                        | 1.12 (1.04, 1.20)                 | 1.73 (1.60, 1.87)                 |
| <i>P</i> <sup>b</sup>              | 0.004                             | <0.001                            |
| Covariate-adjusted AUC (95% CI)    | 0.530 (0.495, 0.564) <sup>d</sup> | 0.643 (0.614, 0.671) <sup>e</sup> |
| Rectal Cancer <sup>a</sup>         |                                   |                                   |
| OR (95% CI)                        | 1.13 (1.05, 1.21)                 | 1.67 (1.55, 1.80)                 |
| <i>P</i> <sup>b</sup>              | <0.001                            | <0.001                            |
| Covariate-adjusted AUC (95% CI)    | 0.531 (0.504, 0.559) <sup>d</sup> | 0.654 (0.630, 0.680) <sup>e</sup> |
| Proximal Colon vs. Distal Colon    |                                   |                                   |
| <i>P</i> <sup>c</sup>              | 0.78                              | <0.001                            |
| Proximal Colon vs. Rectum          |                                   |                                   |
| <i>P</i> <sup>c</sup>              | 0.99                              | <0.001                            |
| Distal Colon vs. Rectum            |                                   |                                   |
| <i>P</i> <sup>c</sup>              | 0.76                              | 0.43                              |

<sup>a</sup>The model includes age, sex, total energy consumption, study, family history, principal components, and the z-transformed ERS and PRS. AUC = area under the ROC curve; CI = confidence interval; ERS = environmental risk score; OR = odds ratio; PRS = polygenic risks core.

<sup>b</sup>2-sided *P* values per the Wald test.

<sup>c</sup>Chi-square test for contrasts in multinomial models. All tests were 2-sided.

<sup>d</sup>The model for estimating the AUC includes a z-transformed ERS as the predictor, adjusting for age, sex, total energy consumption, study, and family history.

<sup>e</sup>The model for estimating the AUC includes a z-transformed PRS as the predictor, adjusting for age, sex, family history, genotype platform, and principal components.

**Supplementary Table 10.** Assessment for the presence of biological interaction between the ERS and PRS<sup>a</sup>

| Measure of Additive Interaction | Estimate (95% CI)     |
|---------------------------------|-----------------------|
| RERI                            | 0.134 (-0.004, 0.271) |
| AP                              | 1.259 (1.187, 1.336)  |
| S                               | 0.081 (0.025, 0.137)  |

<sup>a</sup>AP = proportion attributable to interaction; CI = confidence interval; ERS = environmental risk score; PRS = polygenic risks core; RERI = relative excess risk due to interaction; S = synergy index.

**Supplementary Table 11.** 5-year absolute risk estimates for early-onset CRC with varying risk factor profiles

| Age, years | ERS Percentile            | PRS Percentile | Men <sup>a</sup>  | Women <sup>a</sup> |
|------------|---------------------------|----------------|-------------------|--------------------|
|            |                           |                | Risk (95% CI), %  | Risk (95% CI), %   |
| 25         | Average Risk <sup>b</sup> |                | 0.01 (--)         | 0.01 (--)          |
| 25         | 1%                        | 1%             | 0.00 (0.00, 0.00) | 0.00 (0.00, 0.00)  |
| 25         | 10%                       | 10%            | 0.00 (0.00, 0.00) | 0.00 (0.00, 0.00)  |
| 25         | 50%                       | 50%            | 0.01 (0.01, 0.01) | 0.01 (0.01, 0.01)  |
| 25         | 90%                       | 90%            | 0.02 (0.02, 0.02) | 0.02 (0.02, 0.02)  |
| 25         | 99%                       | 99%            | 0.03 (0.03, 0.03) | 0.03 (0.02, 0.03)  |
| 30         | Average Risk <sup>b</sup> |                | 0.02 (--)         | 0.02 (--)          |
| 30         | 1%                        | 1%             | 0.01 (0.01, 0.01) | 0.01 (0.01, 0.01)  |
| 30         | 10%                       | 10%            | 0.01 (0.01, 0.01) | 0.01 (0.01, 0.01)  |
| 30         | 50%                       | 50%            | 0.02 (0.02, 0.02) | 0.02 (0.02, 0.02)  |
| 30         | 90%                       | 90%            | 0.05 (0.04, 0.05) | 0.04 (0.04, 0.04)  |
| 30         | 99%                       | 99%            | 0.06 (0.05, 0.06) | 0.05 (0.05, 0.05)  |
| 35         | Average Risk <sup>b</sup> |                | 0.04 (--)         | 0.03 (--)          |
| 35         | 1%                        | 1%             | 0.01 (0.01, 0.01) | 0.01 (0.01, 0.01)  |
| 35         | 10%                       | 10%            | 0.01 (0.01, 0.01) | 0.01 (0.01, 0.01)  |
| 35         | 50%                       | 50%            | 0.04 (0.04, 0.04) | 0.03 (0.03, 0.03)  |
| 35         | 90%                       | 90%            | 0.09 (0.09, 0.09) | 0.07 (0.07, 0.07)  |
| 35         | 99%                       | 99%            | 0.11 (0.10, 0.11) | 0.09 (0.08, 0.09)  |
| 40         | Average Risk <sup>b</sup> |                | 0.07 (--)         | 0.07 (--)          |
| 40         | 1%                        | 1%             | 0.02 (0.02, 0.02) | 0.02 (0.02, 0.02)  |
| 40         | 10%                       | 10%            | 0.03 (0.03, 0.03) | 0.03 (0.03, 0.03)  |
| 40         | 50%                       | 50%            | 0.07 (0.07, 0.07) | 0.06 (0.06, 0.06)  |
| 40         | 90%                       | 90%            | 0.16 (0.16, 0.17) | 0.14 (0.14, 0.15)  |
| 40         | 99%                       | 99%            | 0.20 (0.19, 0.21) | 0.17 (0.17, 0.18)  |
| 45         | Average Risk <sup>b</sup> |                | 0.14 (--)         | 0.12 (--)          |
| 45         | 1%                        | 1%             | 0.04 (0.04, 0.04) | 0.04 (0.04, 0.04)  |
| 45         | 10%                       | 10%            | 0.05 (0.05, 0.05) | 0.05 (0.05, 0.05)  |
| 45         | 50%                       | 50%            | 0.13 (0.13, 0.13) | 0.11 (0.11, 0.11)  |
| 45         | 90%                       | 90%            | 0.31 (0.30, 0.32) | 0.25 (0.24, 0.26)  |
| 45         | 99%                       | 99%            | 0.38 (0.37, 0.40) | 0.30 (0.29, 0.32)  |

<sup>a</sup>Models were adjusted for age, study, total energy consumption, family history, genotype platform, and principal components. CI = confidence interval; ERS = environmental risk score; PRS = polygenic risks core.

<sup>b</sup>Average risks in general population were calculated based on SEER incidence rates for men and women separately.
